# Supplementary material
Source: publisher figshare collection journal article supplement (https://acs.figshare.com/ndownloader/files/9920533)
Supplement: Supplementary file 1 [file 9920533]

## **Silver recovery from laundry washwater: role of detergent chemistry**

Tabish Nawaz<sup>a</sup>, Sukalyan Sengupta<sup>a,\*</sup>

<sup>a</sup> Civil and Environmental Engineering Department

University of Massachusetts Dartmouth, 285 Old Westport Road

Dartmouth, MA, 02747

\* Corresponding author

### **Supporting Information**

The Supporting Information is available free of charge on the ACS Publications website at DOI: [10.1021/acs.est.1c01111](#). It contains details on detergent composition (Table S1), resin removal and recovery performance under warm and hot thermal conditions (Table S2). Additional information on Ag<sup>+</sup> speciation study (Figure S1 – S5); notes on Ag<sup>0</sup> precipitation in presence of perborate/TAED (Figure S4); Ag<sub>2</sub>S precipitate analysis (Figure S6), and reusability results & discussion of the resin and regenerant (Section S7).

Number of pages: 17

Number of tables: 2

Number of figures: 22

**Table S1:** Detergent components and their respective concentrations used in the study

| <b>Si. No.</b> | <b>Detergent components</b>                     | <b>Role in laundry</b>       | <b>Concentration (g/l)</b> |
|----------------|-------------------------------------------------|------------------------------|----------------------------|
| (1.)           | Sodium Dodecylbenzene Sulfonate (SDBS)          | Surfactant                   | 0.6                        |
| (2.)           | Sodium Dodecyl Sulfate(SDS)                     | Surfactant                   | 0.2                        |
| (3.)           | Berol 266                                       | Surfactant                   | 0.2                        |
| (4.)           | Diethylenetriamine Pentaacetate (DTPA)          | Builder                      | 0.267                      |
| (5.)           | Zeolite                                         | Builder                      | 0.267                      |
| (6.)           | Sodium Metasilicate Pentahydrate                | Builder                      | 0.267                      |
| (7.)           | Sodium Carbonate                                | Builder                      | 0.1                        |
| (8.)           | Sodium Carboxymethyl Cellulose (CMC)            | Soil Anti-redeposition Agent | 0.04                       |
| (9.)           | Ethanol                                         | Formulation Aid              | 0.24                       |
| (10.)          | 4,4' – diamino – 2,2' – stilbenedisulfonic acid | Optical Brightener           | 0.0023                     |
| (11.)          | Sodium Perborate                                | Bleach                       | 0.14; 0.52                 |
| (12.)          | Tetraacetyleneethylenediamine (TAED)            | Bleach Activator             | 0.021; 0.078               |

The concentration of detergent in laundry wash solutions is typically 1 g/l<sup>1</sup>. In the present work, the detergent formulation we have used is ~2 g/l concentration. This is done to test the recovery scheme under conditions harsher than what is typically found in household laundry systems. The relative concentration and composition of each component is taken from<sup>2,3</sup>.

**Table S2:** Ag-removal & recovery performance of the resin in presence of individual detergent components under warm (35°C) and hot (55°C) wash thermal conditions (Initial [Ag<sup>+</sup>]: 5 mg/l; resin mass: 0.05 g; solution volume: 0.5 l)

| Si. No. | Detergent Component | Warm Wash |            | Hot Wash  |            |
|---------|---------------------|-----------|------------|-----------|------------|
|         |                     | % Removal | % Recovery | % Removal | % Recovery |
| (1.)    | SDBS                | 95        | 84         | 96        | 92         |
| (2.)    | SDS                 | 91        | 89         | 96        | 88         |
| (3.)    | Berol               | 94        | 94         | 99        | 92         |
| (4.)    | DTPA                | 92        | 89         | 98        | 96         |
| (5.)    | Carbonate           | 98        | 90         | 95        | 91         |
| (6.)    | CMC                 | 97        | 86         | 98        | 83         |
| (7.)    | Metasilicate        | 94        | 91         | 98        | 97         |
| (8.)    | Ethanol             | 91        | 91         | 93        | 87         |
| (9.)    | Stilbene            | 99        | 87         | 98        | 93         |
| (10.)   | Perborate/TAED      | -         | 68         | -         | 57         |

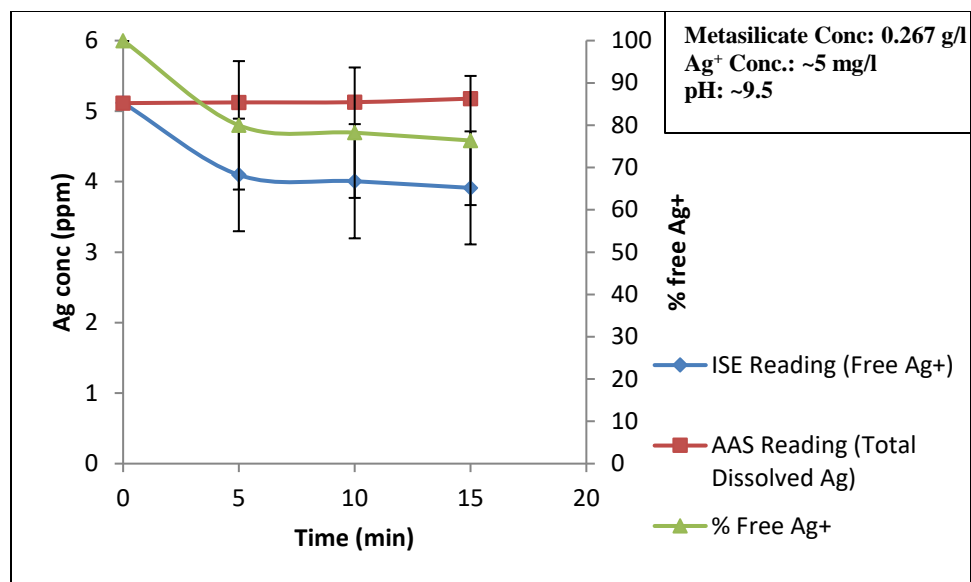

Figure S1(a.): Free Ag<sup>+</sup> & total dissolved Ag concentration profile in presence of metasilicate at pH ~9.5

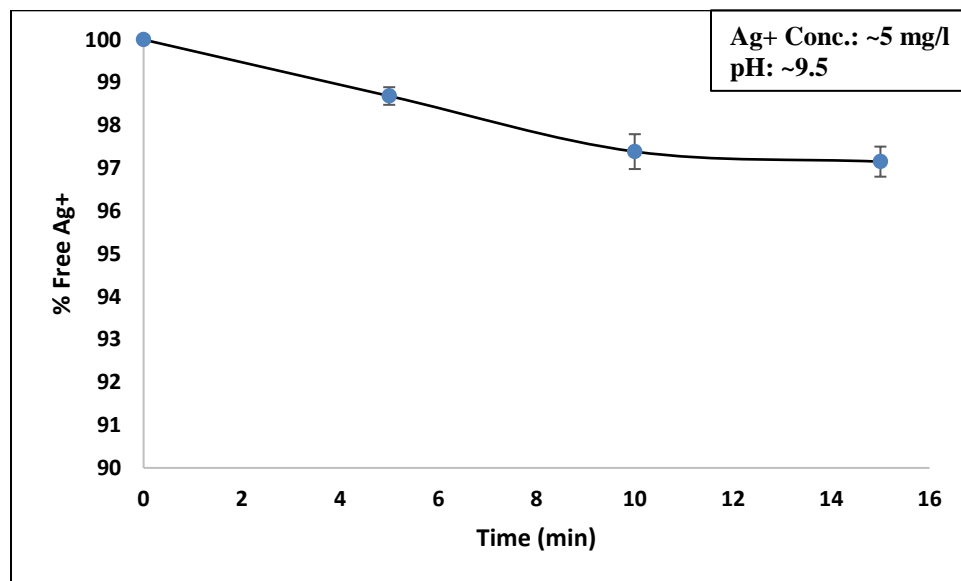

Figure S1 (b.): % Free Ag<sup>+</sup> profile in the solution at pH ~9.5 (no metasilicate)

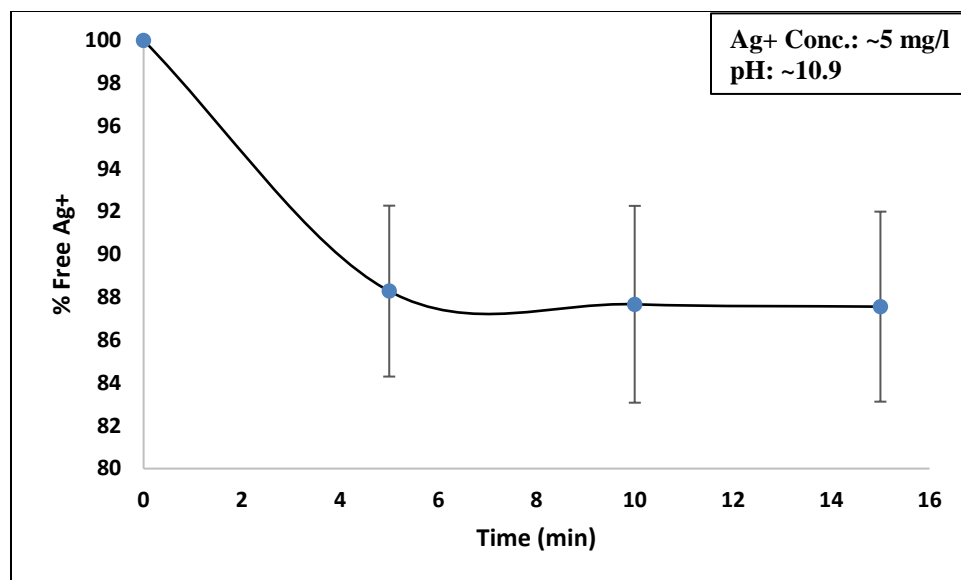

Figure S1 (c.): % Free  $\text{Ag}^+$  profile in the solution at pH ~10.9 (no metasilicate)

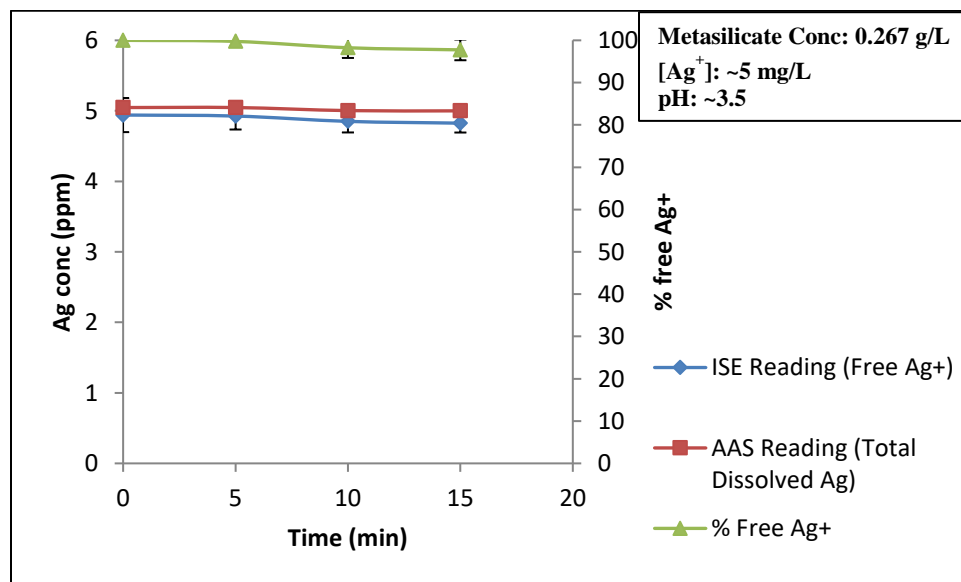

Figure S1 (d.): Free  $\text{Ag}^+$  & total dissolved Ag concentration profile in presence of metasilicate at pH ~3.5

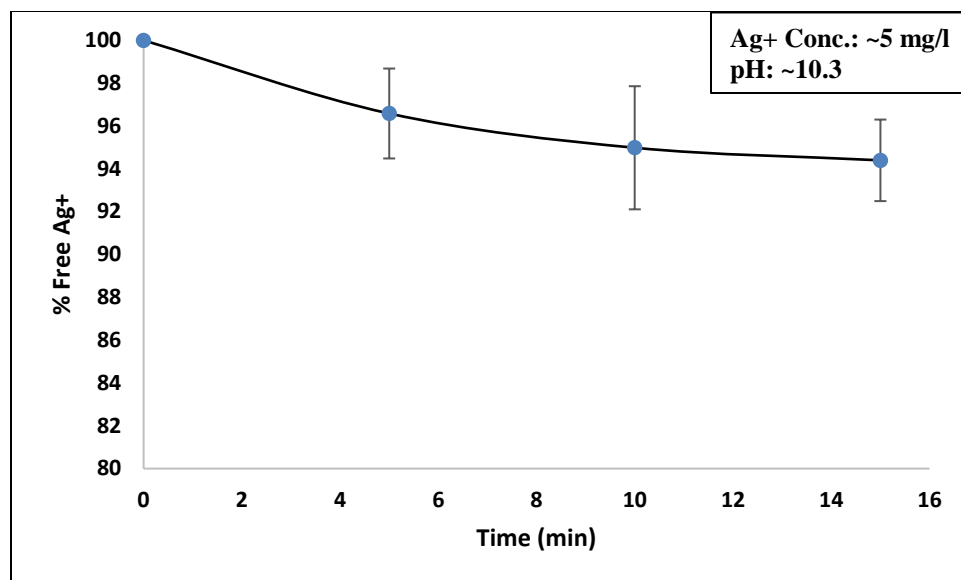

Figure S2: % Free Ag<sup>+</sup> profile in the solution at pH ~10.3 (no detergent component present)

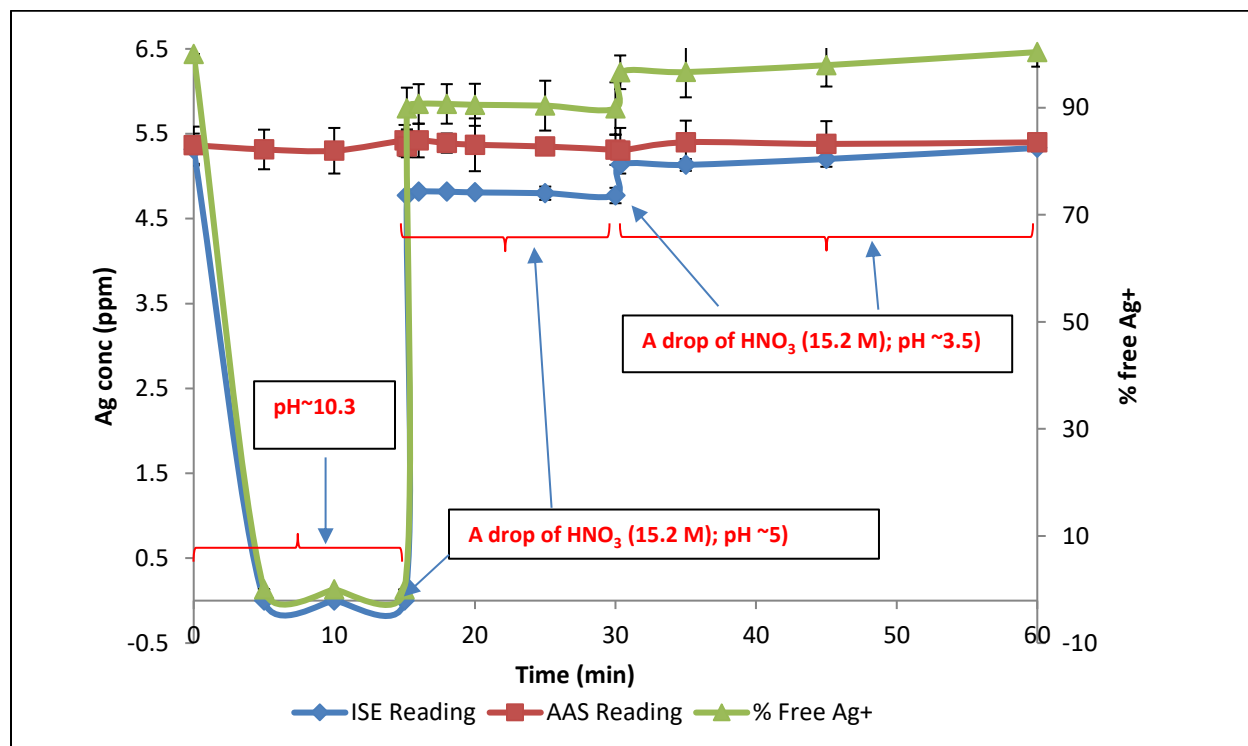

Figure S3(a): Free Ag<sup>+</sup> concentration profile in the presence of DTPA under different pH values.

In alkaline pH ~10.3, free Ag<sup>+</sup> signal is zero, at t=15 minutes, addition of a drop of 67-70% nitric acid reduces the pH to ~5, and free Ag<sup>+</sup> signal rises instantaneously (~90% of its initial value),

indicating freeing up of  $\text{Ag}^+$  from DTPA chelation, further addition of a drop the same acid, reduces the pH to  $\sim 3.5$ , and free  $\text{Ag}^+$  signal is fully restored, implying chelating groups in DTPA are protonated and not available to take up  $\text{Ag}^+$ .

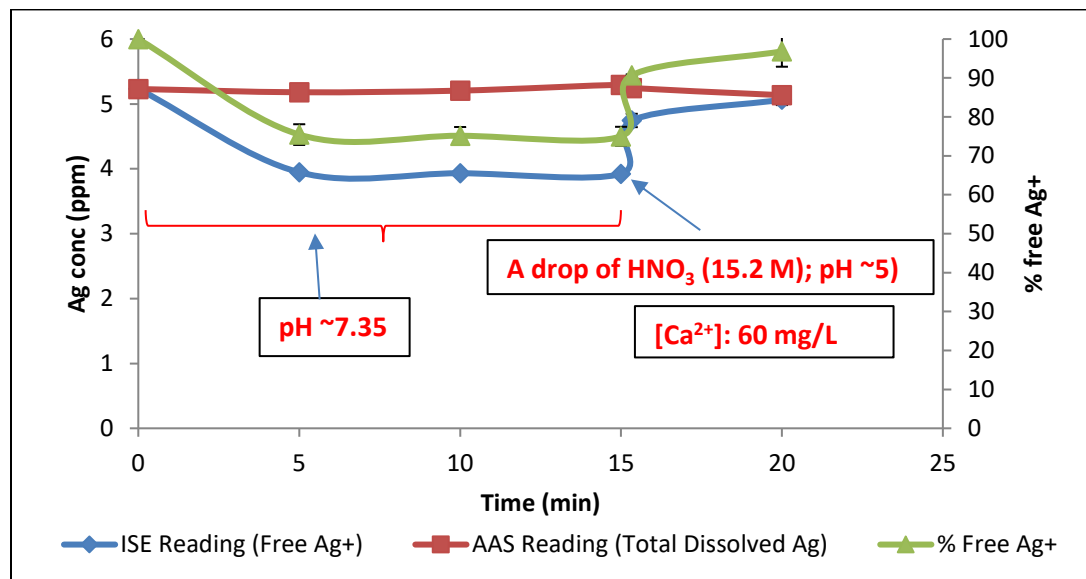

Figure S3(b.): Free  $\text{Ag}^+$  concentration profile in the presence of DTPA, when 60 mg/l  $\text{Ca}^{2+}$  was present along with 5 mg/l  $\text{Ag}^+$  from the beginning. The pH in this case rises to 7.35 from 5 on adding DTPA whereas in the previous case, when  $\text{Ca}^{2+}$  was not present, the pH rose to  $\sim 10.3$ . Also free  $\text{Ag}^+$  signal reduced only to  $\sim 75\%$  of its initial value, unlike in the previous case where it completely vanished. This implies that DTPA is preferentially chelated with  $\text{Ca}^{2+}$  over  $\text{Ag}^+$ ; however, it did take some  $\text{Ag}^+$  (loss in signal) and  $\text{H}^+$  (rise in pH). On adding a drop of 15.2M nitric acid, free  $\text{Ag}^+$  signal was fully restored to its initial value.

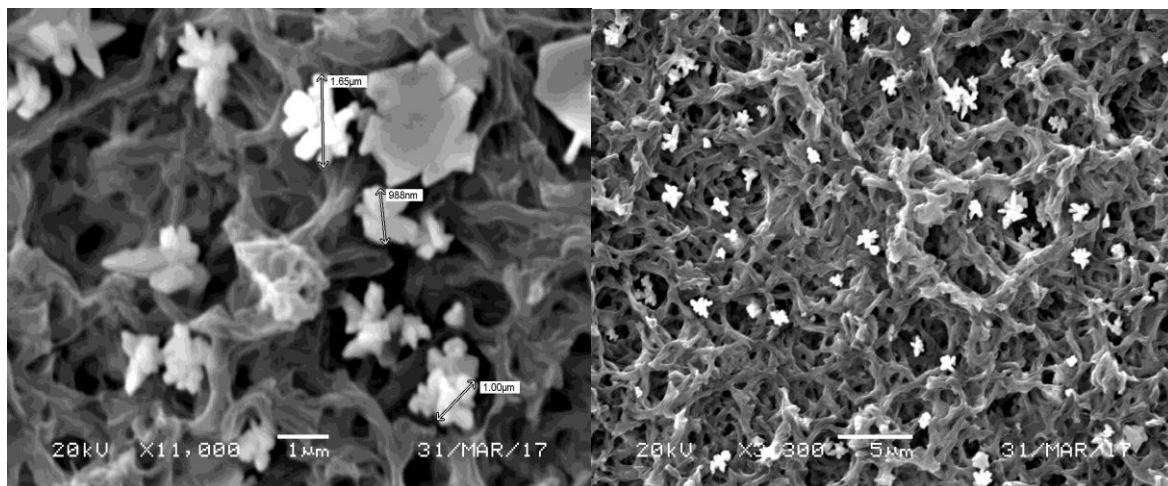

Figure S4(a): SEM image of the precipitate formed during  $\text{Ag}^+$  speciation study with perborate/TAED at pH  $\sim 9.5$ ; the background is of filter paper, and the flower like particles are  $\text{Ag}^0$ . EDS spectra (Figure S4 (b.)) showed Ag, C & O peaks.

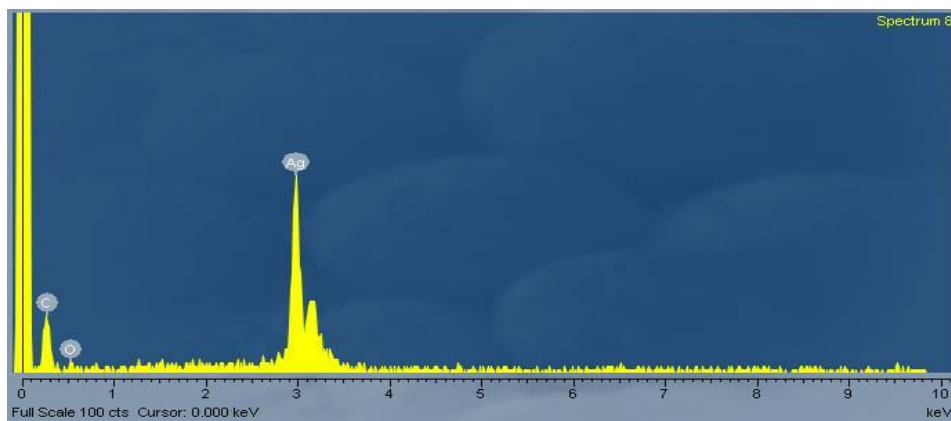

Figure S4(b): EDS spectra of the precipitate formed during  $\text{Ag}^+$  speciation study with perborate/TAED at pH  $\sim 9.5$ .

The spectra shows prominent Ag peak and small peaks of C & O due to the background filter paper. In order to eliminate the background signal, we conducted the experiment in a 5 liter solution. This produced 5 times more precipitate, which we collected and easily scraped as flakes from the filter paper, and put directly on the EDS stub, coating it completely. The EDS spectra



obtained thereby (Figure S4(c.)), revealed only Ag peaks, which indicated the precipitate to be pure  $\text{Ag}^0$ .

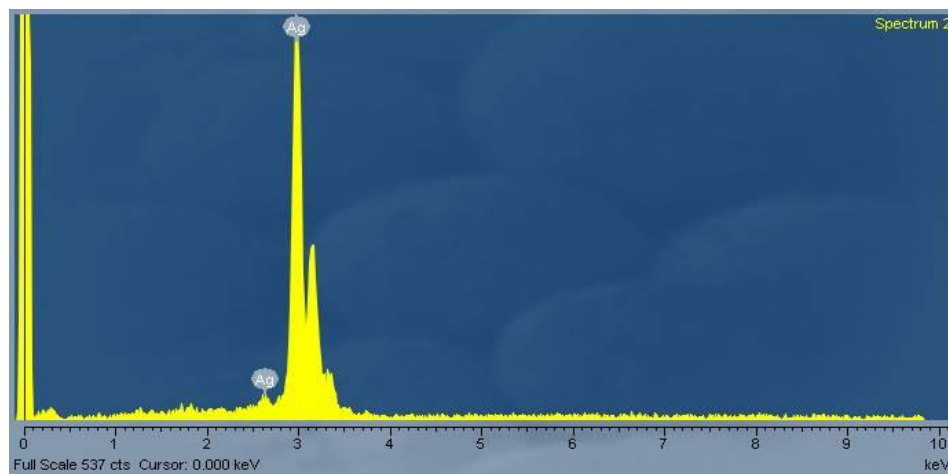

Figure S4(c.): EDS spectra of  $\text{Ag}^0$  precipitate without filter paper background; this proves that precipitate formed during  $\text{Ag}^+$  speciation study with perborate/TAED system is  $\text{Ag}^0$ .

Elemental mapping done on the sample in EDS with filter background (Figure S4(d.) & (e.)) also conclusively proves that the precipitate was of pure  $\text{Ag}^0$ .

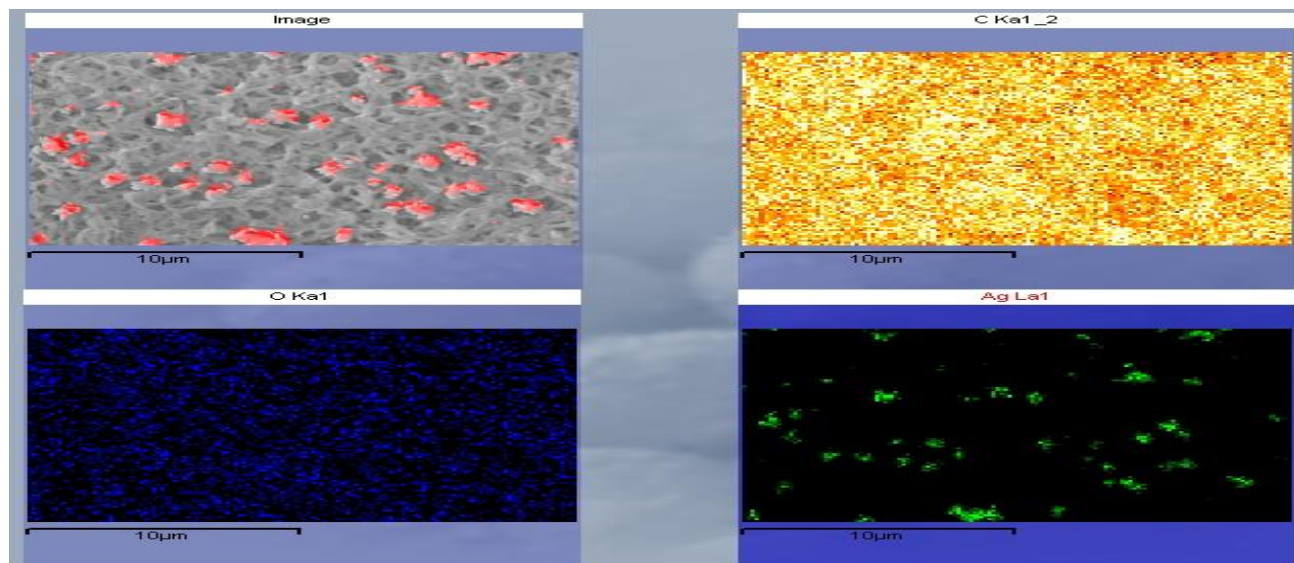

Figure S4(d.): Elemental mapping of the precipitate with filter paper background done on EDS.

In Figure S4(d.), it can be clearly seen that Ag signal exactly corresponds to the location of the particles in the sample, whereas C & O signals are everywhere, except at the particles' locations. This is indicative of the particle identity as  $\text{Ag}^0$ . Figure S4(e.) also reveals similar elemental mapping results, where the particle location exactly corresponds to Ag signal; C & O signals due to the background are present throughout, but not at the particle location. Were the precipitate to be some salt of Ag, the elemental mapping would have shown the other elements' signals at the particles' location. In our case, we clearly see only Ag signals corresponding to the particles' locations.

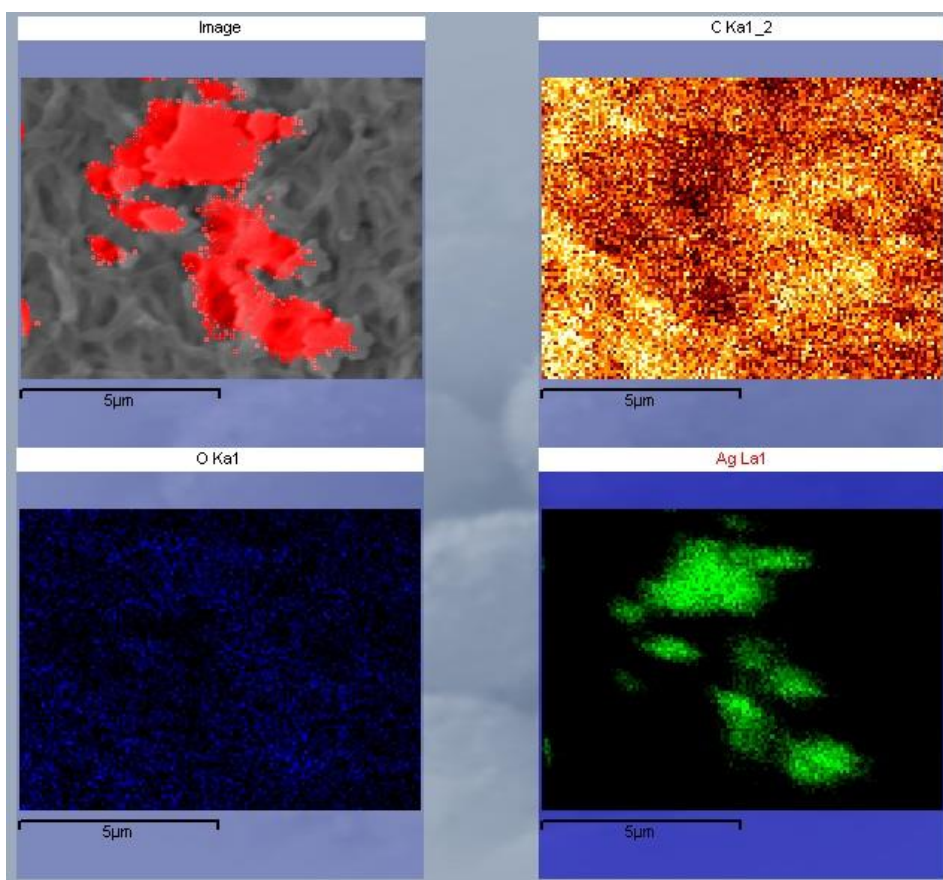

Figure S4(e.): Elemental mapping of the precipitate with filter paper background done on EDS.

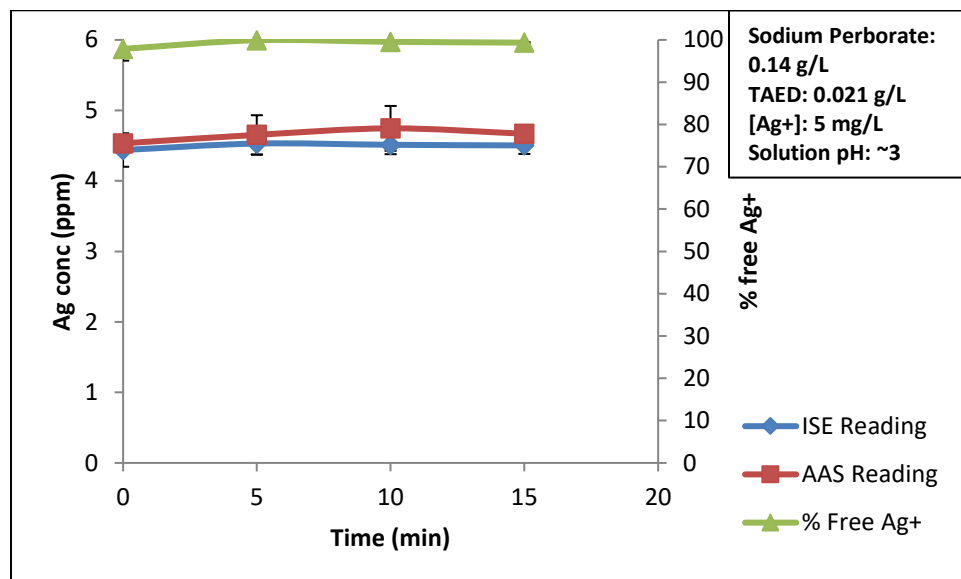

Figure S5(a.): Free Ag<sup>+</sup> & total dissolved Ag concentration profile in presence of perborate/TAED at pH ~3

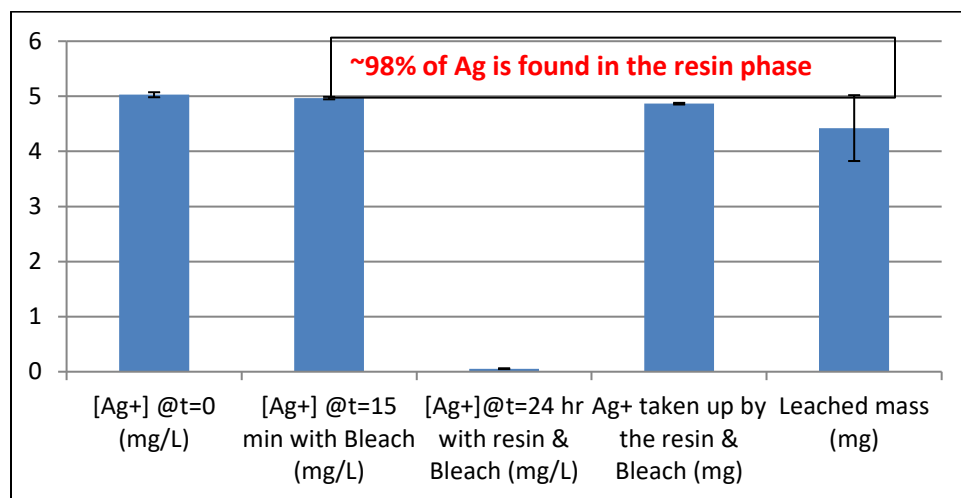

Figure S5(b.): Resin Ag-removal and recovery performance in presence of sodium perborate (0.14 g/l) and TAED (0.021 g/l) at pH ~3.

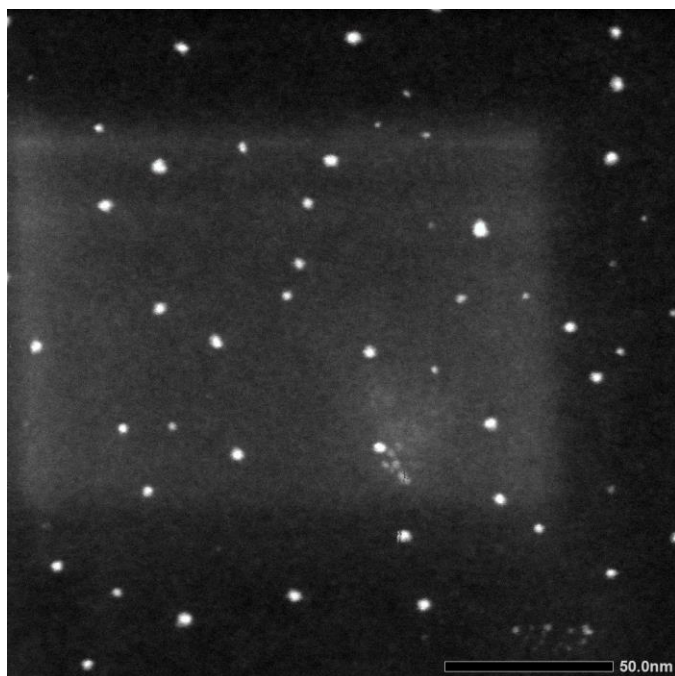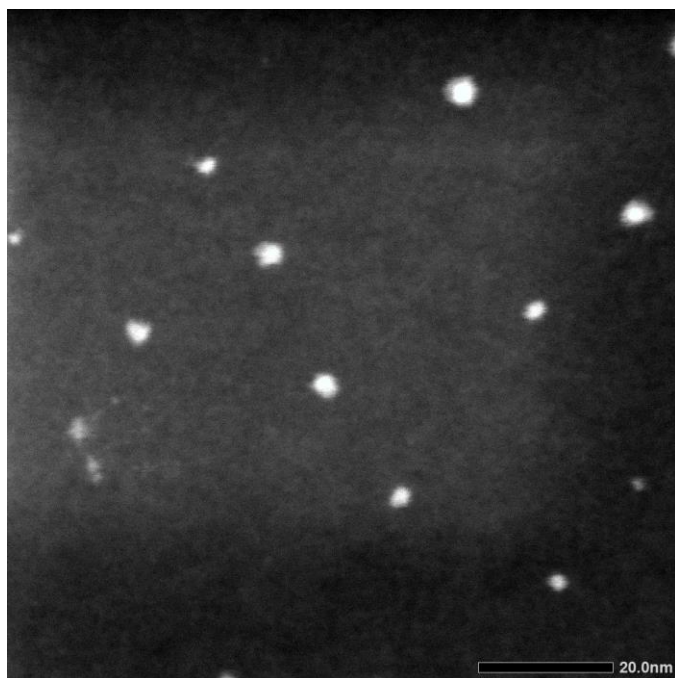

Figure S6 (a.): TEM images of the precipitate obtained during the onset of precipitation, when the solution turned light brown at a pH of  $\sim 7$ -8; particles on size range  $\sim 3$ -7 nm were prominently noticed

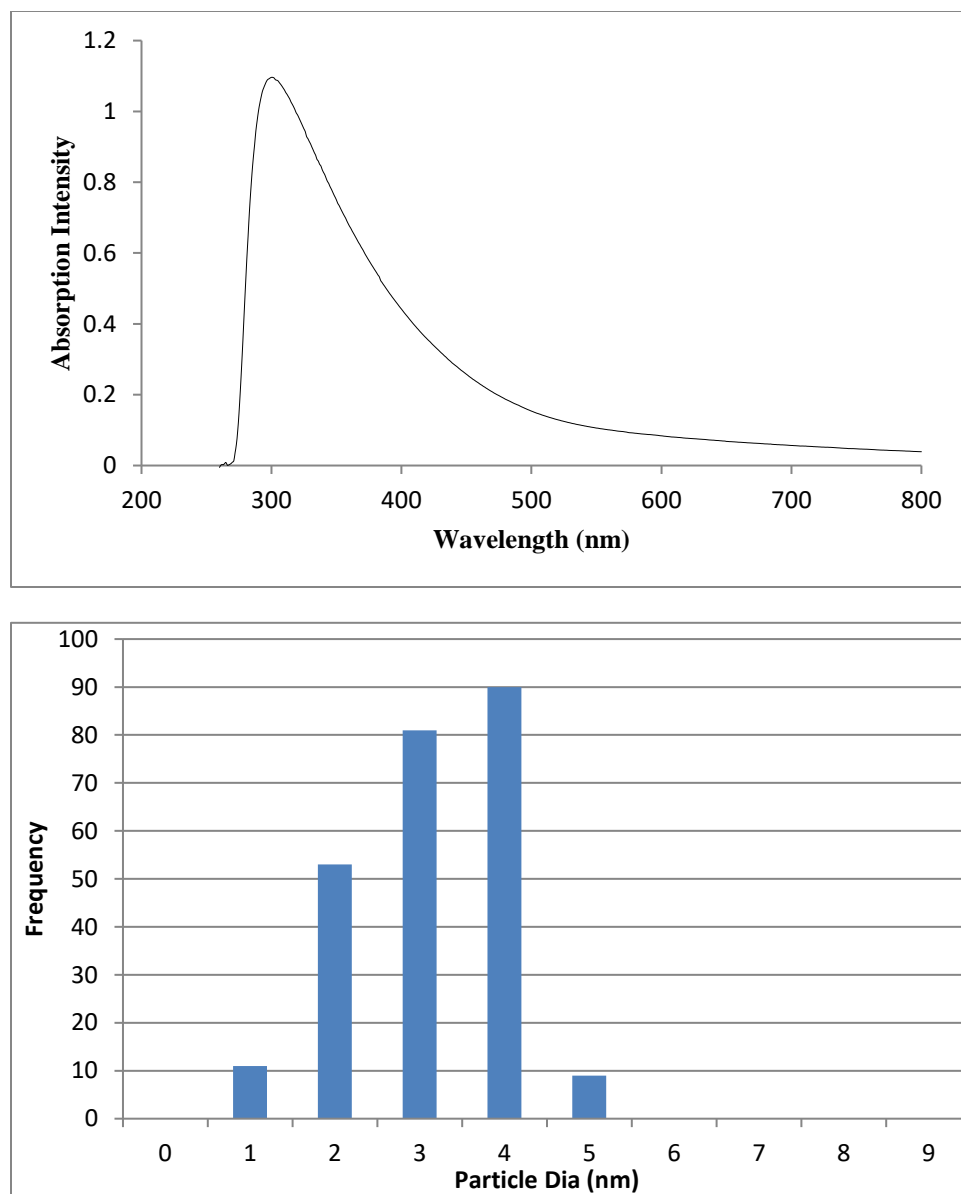

Figure S6 (b.): UV-Vis spectra of the solution during the onset of precipitation (pH ~7-8) and the particle size distribution analyzed Imagej (an image processing program developed at the National Institute of Health, USA). ~250 particles were analyzed from the TEM images; average particle size was calculated as ~3 nm.

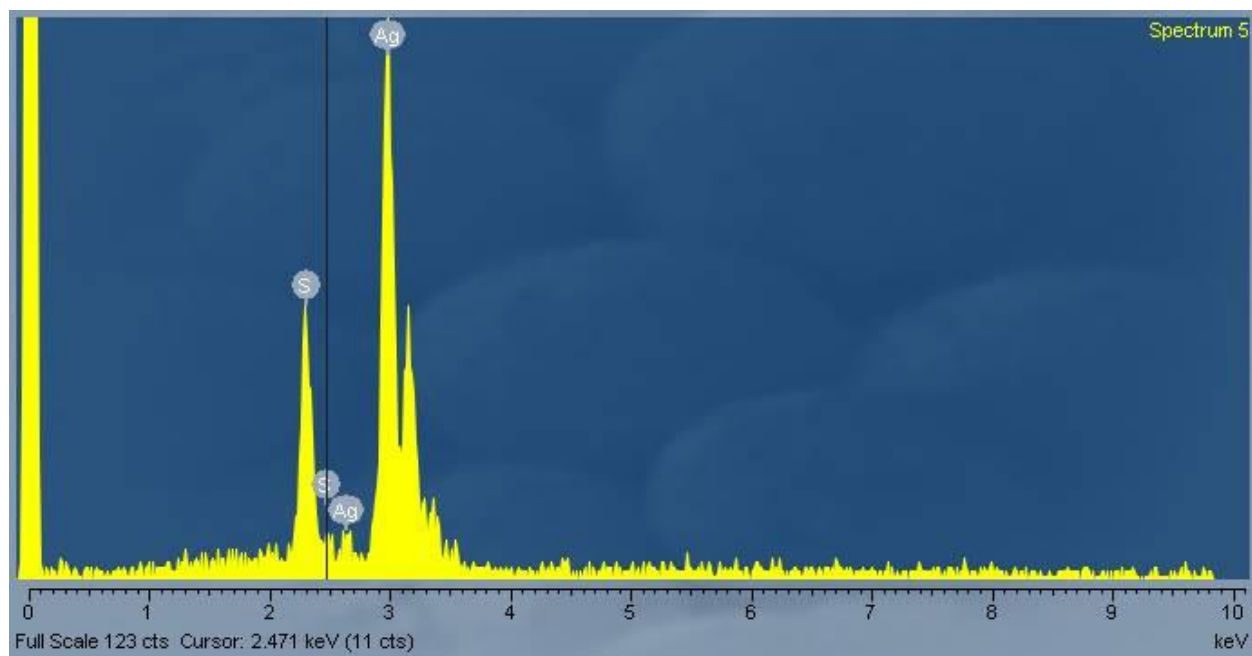

Figure S6 (c.): EDS spectra of black precipitate obtained by hydrolyzing the spent regenerant in 1N NaOH (elemental composition of the precipitate: Ag = 86.79%, S = 13.21%)

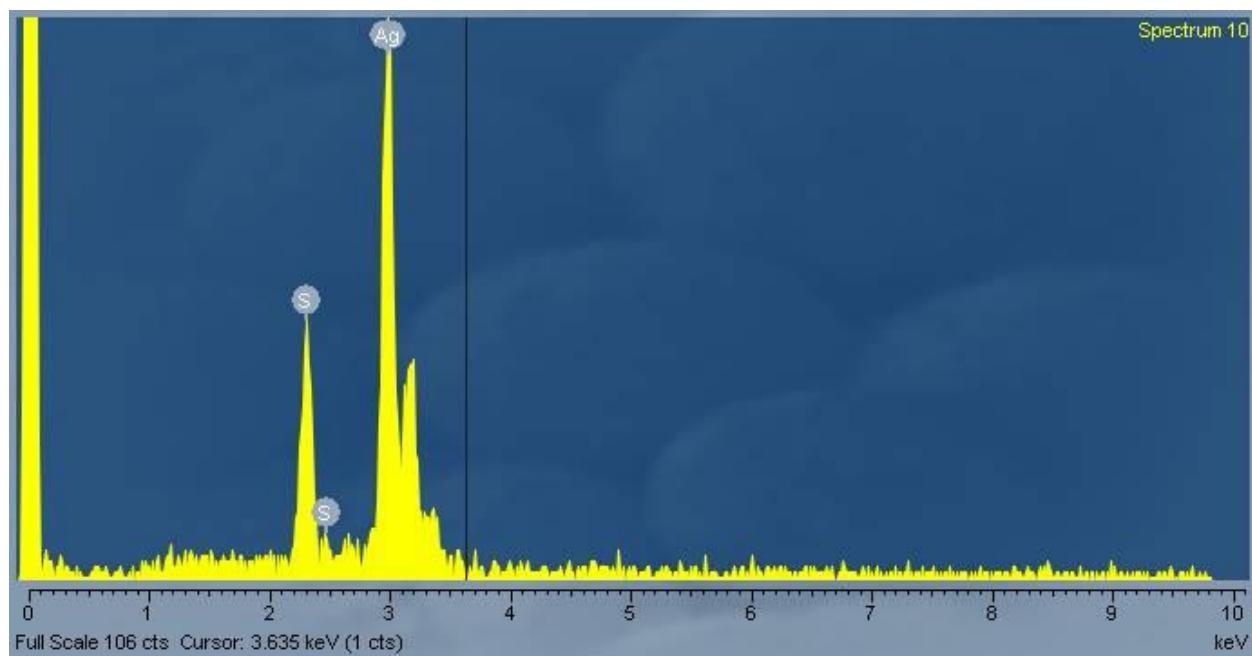

Figure S6 (d.): EDS spectra of 99.5% pure assay  $\text{Ag}_2\text{S}$  standard (Alfa Aesar) (elemental composition of the precipitate: Ag = 86.98%, S = 13.02%)

On comparing the spectra and elemental composition as shown by the EDS analysis of the precipitate and  $\text{Ag}_2\text{S}$  standard (Figure S6 (c.) & (d.)), it can be inferred that the precipitate obtained in the study is high purity (>99%)  $\text{Ag}_2\text{S}$ . The mechanism of the precipitation can be found in our previous work.

#### **S7. Reuse & recycling of the resin & the regenerant.**

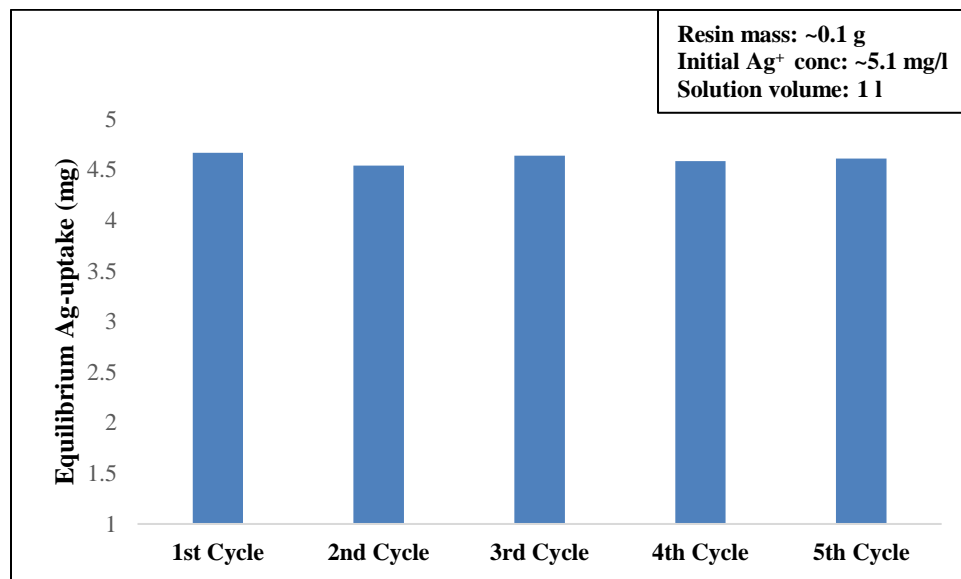

Figure S7 (a.): Reusability of the resin demonstrated over 5 cycles of Ag-uptake study in batch mode

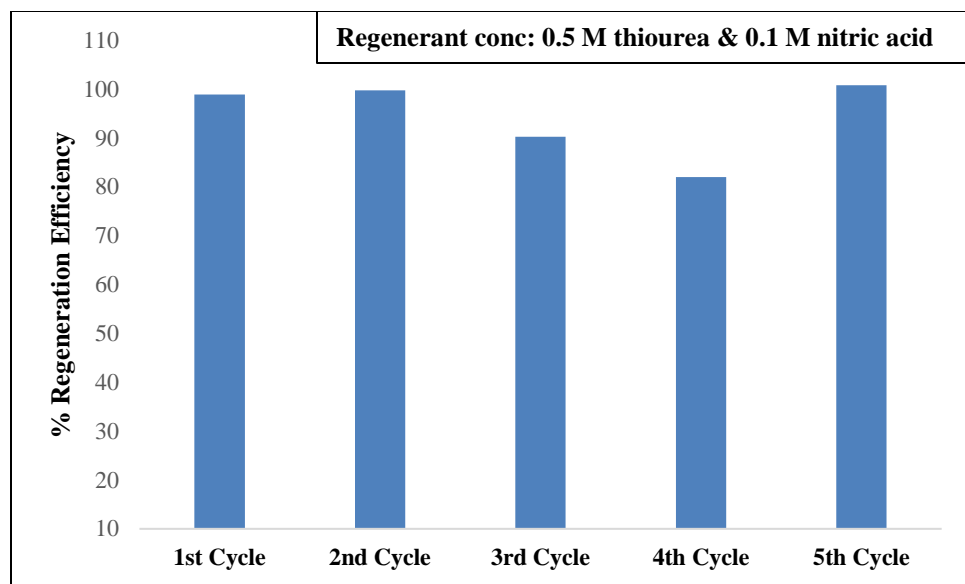

Figure S7 (b.): Reusability of the regenerant demonstrated over 5 cycles

To make the recovery scheme sustainable, the resin and the spent regenerant were reused over multiple cycles. The resin showed no compromise in its Ag-uptake capacity from the detergent solution (SI, Figure S7 (a)) over 5 cycles studied. The regenerant, after extraction of Ag, was reused for 5 cycles (SI, Figure S7 (b)). The regenerant in its first two cycles recovered ~100% of Ag in the resin phase. However, the regeneration efficiency declined in 3<sup>rd</sup> (~90%) and 4<sup>th</sup> (~82%) cycles. This is due to the loss of thiourea to Ag<sub>2</sub>S precipitation after each reuse<sup>4</sup>. Also, during the pH adjustment (from ~11-12 to ~1-1.5) post-precipitation before each reuse, foul smell (most probably of H<sub>2</sub>S gas) was noticed. This implied further loss of thiourea as H<sub>2</sub>S. Additionally, volume loss was also observed at each successive stage, reducing to 86 ml (from 100 ml initially) at the end of 4<sup>th</sup> cycle. The volume loss was compensated by adding 14 ml of the fresh regenerant solution. This is reflected in the improvement in the regeneration efficiency (~100%) at the end of 5<sup>th</sup> cycle. The result provides a comparative idea about the performance of the resin and the spent regenerant over multiple cycles of reuse. It is concluded that the resin and the spent regenerant can be reused for at least 5 cycles without significant loss in their performance.



## References:

- (1) Cameron, B. A. Family and Consumer Sciences. *Fam. and Consum. Sci. Res. Jour.* **2007**, 36(2), 151-162.
- (2) Sachdev, A.; et al. Heavy-duty liquid detergents. In *Liquid Detergents*; Lai, K.Y., Ed.; 2<sup>nd</sup>, ed.; Surfactant science series; V.129; CRC Press. **2006**
- (3) Smulders, E.; Von Rybinski, W.; Sung, E.; Rähse, W.; Steber, J.; Wiebel, F.; Nordskog, A. *Laundry detergents*. Wiley-VCH Verlag GmbH & Co. KGaA. **2007**
- (4) Nawaz, T.; Sengupta, S. Silver recovery from greywater: Role of competing cations and regeneration. *Sep. Pur. Technol.* **2017**, 176, 145-158.
